# Supplementary material for: Opposite Modulation of RAC1 by Mutations in TRIO Is Associated with Distinct, Domain-Specific Neurodevelopmental Disorders
Source: PubMed Central journal article supplement (PMC7058823; doi:10.1016/j.ajhg.2020.01.018), 2020-02-27
Supplement: mmc1.pdf [file mmc1.pdf]

## Supplemental Data

### Opposite Modulation of RAC1 by Mutations in *TRIO*

### Is Associated with Distinct, Domain-Specific

### Neurodevelopmental Disorders

Sónia Barbosa, Stephanie Greville-Heygate, Maxime Bonnet, Annie Godwin, Christine Fagotto-Kaufmann, Andrey V. Kajava, Damien Laouteouet, Rebecca Mawby, Htoo Aung Wai, Alexander J.M. Dingemans, Jayne Hehir-Kwa, Marjolaine Willems, Yline Capri, Sarju G. Mehta, Helen Cox, David Goudie, Fleur Vansenne, Peter Turnpenny, Marie Vincent, Benjamin Cogné, Gaëtan Lesca, Jozef Hertecant, Diana Rodriguez, Boris Keren, Lydie Burglen, Marion Gérard, Audrey Putoux, C4RCD Research Group, Vincent Cantagrel, Karine Siquier-Pernet, Marlene Rio, Siddharth Banka, Ajoy Sarkar, Marcie Steeves, Michael Parker, Emma Clement, Sébastien Moutton, Frédéric Tran Mau-Them, Amélie Piton, Bert B.A. de Vries, Matthew Guille, Anne Debant, Susanne Schmidt, and Diana Baralle

**A**

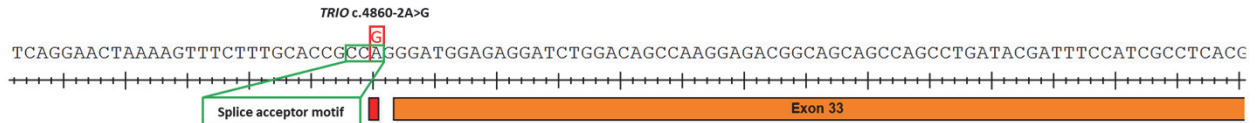

**B**

| ▼ HSF Matrices    |               |                  |                |                 |           |        |                                            |                       |  |  |  |
|-------------------|---------------|------------------|----------------|-----------------|-----------|--------|--------------------------------------------|-----------------------|--|--|--|
| Sequence Position | cDNA Position | Splice site type | Motif          | New splice site | Wild Type | Mutant | If cryptic site use, exon length variation | Variation (%)         |  |  |  |
| 11                | 11            | Acceptor         | TTGCACCGCCAGGG | ttgcaccgcggg    | 88.91     | 59.96  | -11                                        | Site broken<br>-32.56 |  |  |  |
| 19                | 19            | Acceptor         | CCAGGGATGGAGAG | ccgggatggagAG   | 67.38     | 67.49  | -19                                        | +0.16                 |  |  |  |
| 21                | 21            | Acceptor         | AGGGATGGAGAGGA | gggatggagagGA   | 65.06     | 65.25  | -21                                        | +0.29                 |  |  |  |

  

| ▼ MaxEnt                                        |               |           |           |           |           |               |                         |           |                        |           |               |
|-------------------------------------------------|---------------|-----------|-----------|-----------|-----------|---------------|-------------------------|-----------|------------------------|-----------|---------------|
| Threshold values:<br>5' Motif: 3    3' Motif: 3 |               |           |           |           |           |               |                         |           |                        |           |               |
| Sequence Position                               | cDNA Position | 5' Motif  |           |           |           |               | 3' Motif                |           |                        |           |               |
|                                                 |               | Ref Motif | Ref Score | Mut Motif | Mut Score | Variation (%) | Ref Motif               | Ref Score | Mut Motif              | Mut Score | Variation (%) |
| 3                                               | 3             |           |           |           |           |               | AAGTTTCTTTGCACCGCCAGGGA | 4.76      | aagtttctttgcaccgcgggGA | -3.19     | -167.02       |

**C**

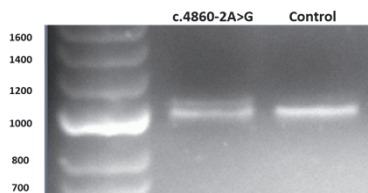

**D**

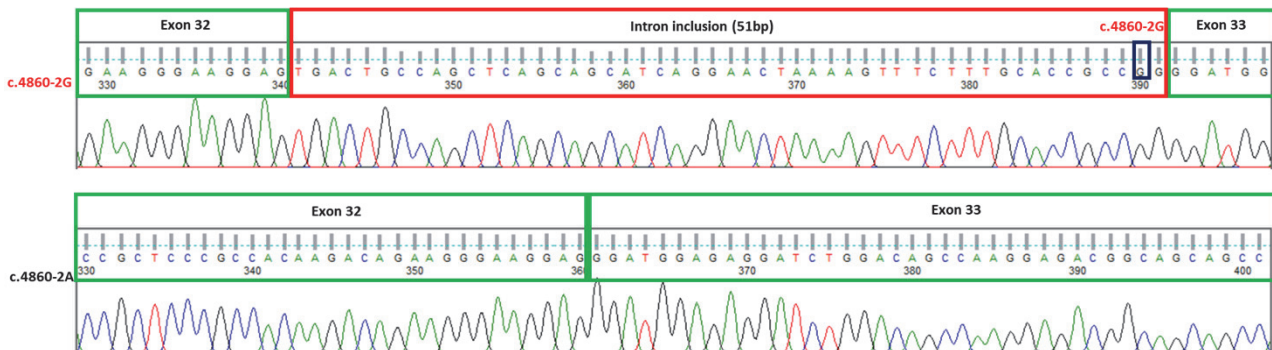

**Figure S1: Impact of splice acceptor site variant in *TRIO* (c.4860-2A>G) on aberrant splicing. A.** c.4860-2A>G is located in splice acceptor motif site of Exon 33. **B.** Human Splice Site Finder (HSF Version 3.1) and MaxEntScan predicted splice acceptor site broken. **C.** Gel electrophoresis shows an extra band in c.4860-2A>G PCR. **D.** Sanger sequencing shows an extra 51 nucleotides between Exon 32 and Exon 33.

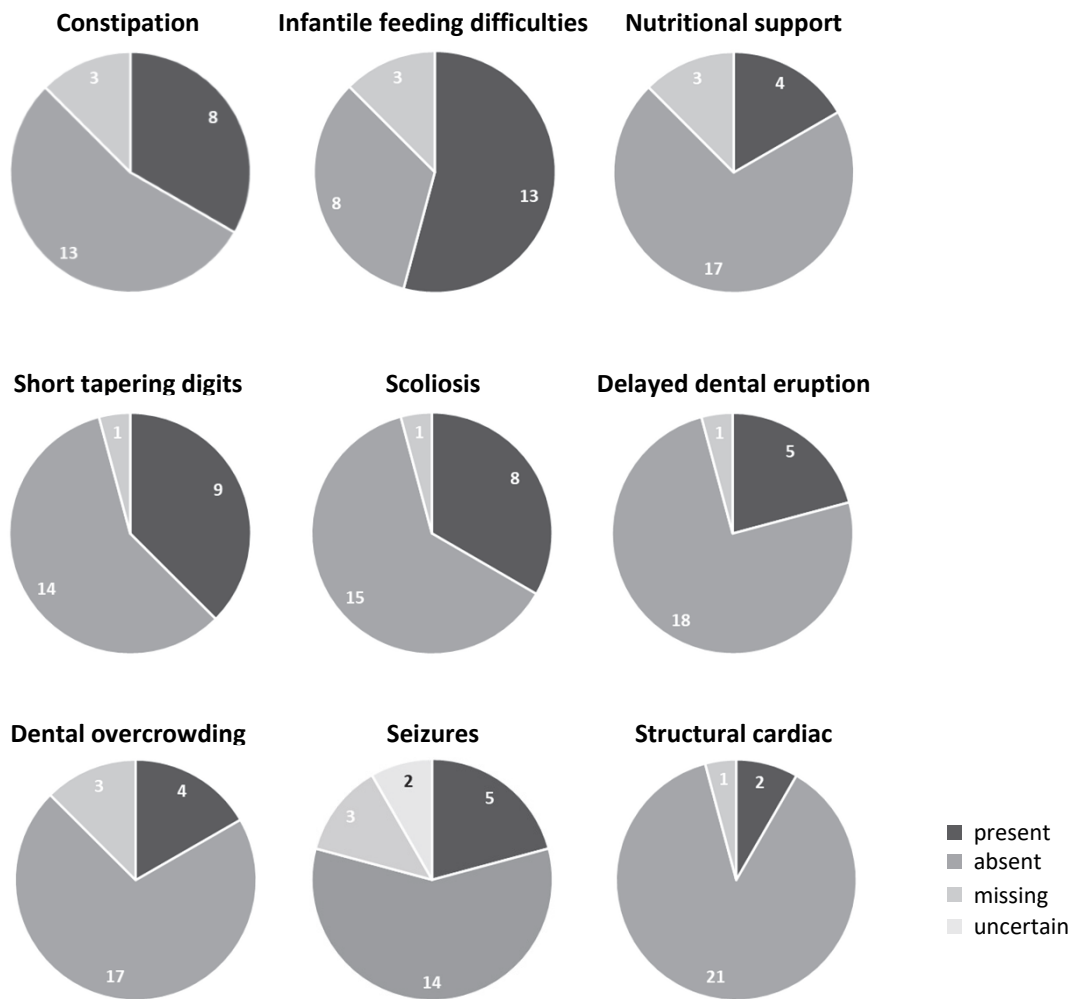

**Figure S2: Expanded phenotype characteristics across the cohort.** Gastrointestinal features including infantile feeding difficulties and constipation were frequently observed. Skeletal manifestations including short tapering digits, scoliosis and delayed dental eruption were also noted. Classified as: present, dark grey; absent, middle grey; missing, light grey and uncertain, very light grey.

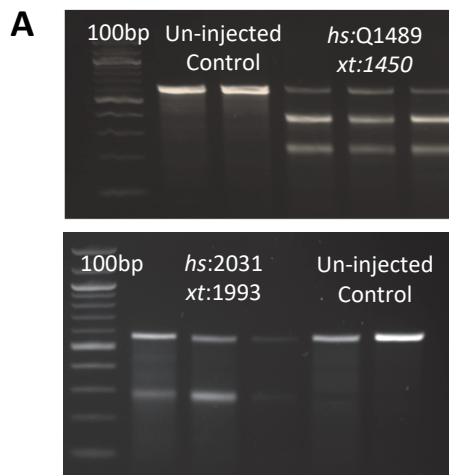

**B**

|   | Head diameter (mm) |       |       |
|---|--------------------|-------|-------|
|   | Control            | Q1450 | L1994 |
| 1 | 1.712              | 1.018 | 1.533 |
| 2 | 1.619              | 1.189 | 1.674 |
| 3 | 1.553              | 1.302 | 1.753 |
| 4 | 1.581              | 1.258 | 1.743 |
| 5 | 1.864              | 0.79  | 1.793 |
| 6 | 1.551              | 1.479 | 1.357 |
| 7 | 1.6                | 0.283 | 1.683 |
| 8 | 1.68               | 1.688 | 1.657 |

**C**

**Control – Wild-type *Xenopus tropicalis***

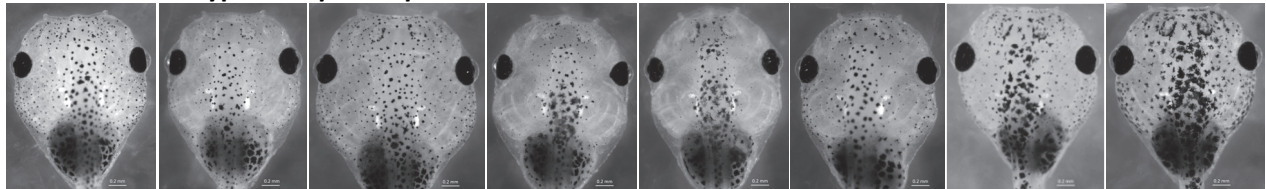

**hs:Q1489, xt:Q1450 truncation**

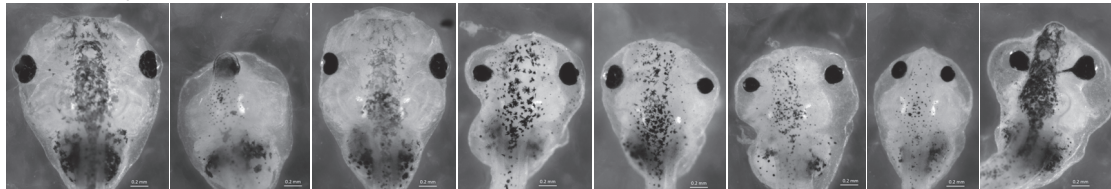

**hs:L2031, xt:L1994 truncation**

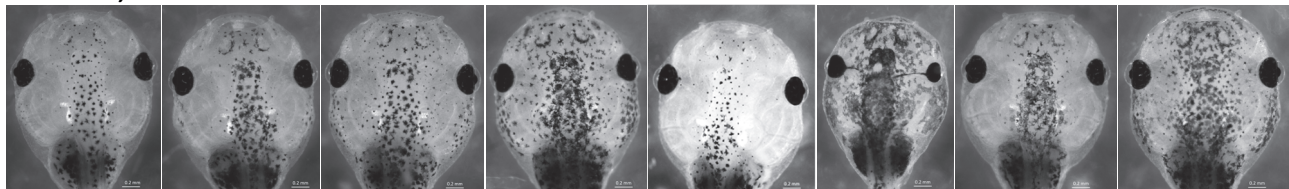

**Figure S3: Truncation in the GEFD1 domain reduces head size in *X.tropicalis*.**

**A.** Amplification of the target region followed by T7 endonuclease assay and Sanger sequencing confirmed that indels had been made at the target sites creating the truncations shown. **B.** Measurement of the head diameter of the injected tadpoles, 8 individuals per condition. **C.** Micrographs of all tadpoles used in the experiment.

**Control – Wild-type *Xenopus tropicalis***

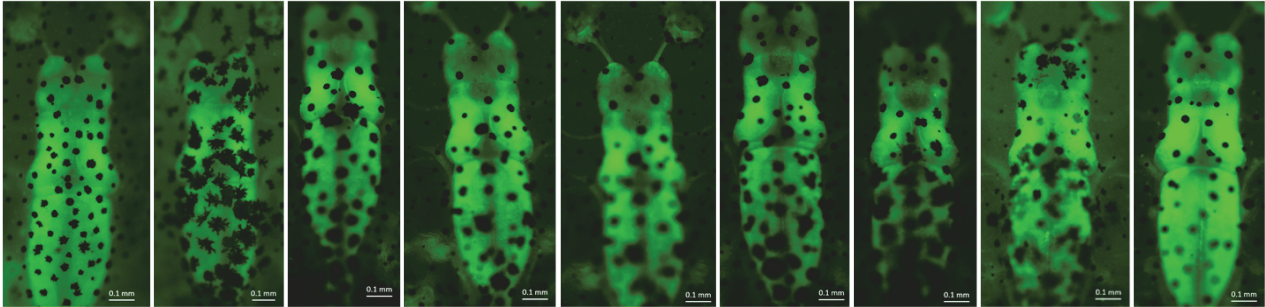

**hs:Q1489, xt:Q1450 truncation**

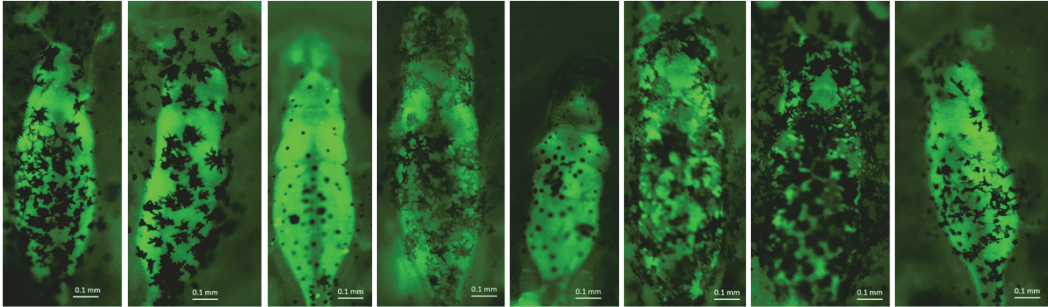

**hs:L2031, xt:L1993 truncation**

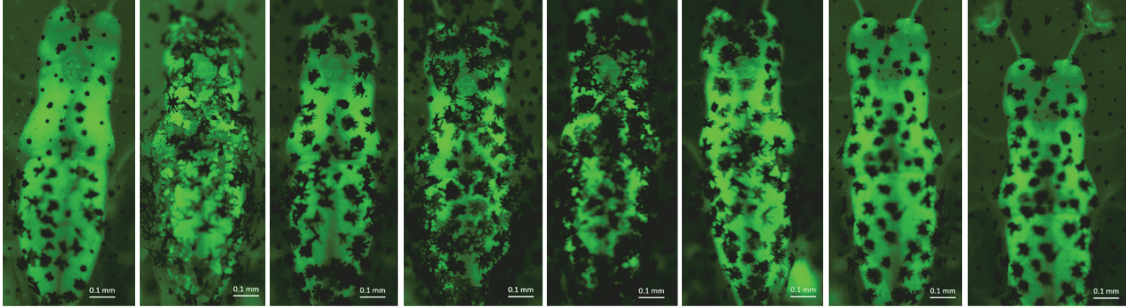

**Figure S4: Truncation in the GFD1 domain shows forebrain deformities in *X.tropicalis*.**

GFD1 and GFD2 frameshifts were performed in a *tubb2B.GFP* transgenic *X. tropicalis* line, in order to examine gross structural abnormalities of the brain. This transgenic line labels differentiated neurons, and revealed forebrain deformities in the GFD1 truncation.

| trio single guide RNAs (Human, <i>Xenopus tropicalis</i> ) | Genotyping PCR primers      |
|------------------------------------------------------------|-----------------------------|
| Q1489*, Q1450                                              |                             |
| taatacgactcactataGGTGAGAACATTGAATCTCAgttttagagctagaa       | FWD: acaacaactttaaaccgaaaca |
| taatacgactcactataGGAAGAGTCTTTCAAGTGTgttttagagctagaa        | REV: ctgaaagcagctgagccagt   |
| L2031*, L1993*                                             |                             |
| taatacgactcactataGGTGAAGTGGAAAGGTGCCgttttagagctagaa        | FWD: atgctgcagaactgggattg   |
| taatacgactcactataGGGTGAAGTGGAAAGGTGCCgttttagagctagaa       | REV: cctactcagcagggtcacag   |

**Table S2:** Oligonucleotides used to synthesise single guide RNAs and to amplify target regions of TRIO. Single guide RNA sequences were chosen using CRISPRscan; the target region itself is in uppercase and the oligonucleotides include a T7 RNA polymerase promoter in lowercase at the 5' end and part of the conserved region that binds Cas9 in lowercase at the 3' end. For the experiments shown here the upper sequence of each pair was used for both the GEFD1 and the GEFD2 truncating mutants.

|             | Age in Months |     |        |        |       |        |      |         |
|-------------|---------------|-----|--------|--------|-------|--------|------|---------|
|             | Domain        | Min | 1st Qu | Median | Mean  | 3rd Qu | Max  | P value |
| First Words | Group 1       | 36  | 48     | 53     | 52    | 57     | 66   | 0.561   |
|             | Group 2       | 17  | 22.25  | 39     | 38.75 | 55.5   | 60   |         |
| Walking     | Group 1       | 24  | 25.5   | 33     | 42    | 49.5   | 84   | 0.035   |
|             | Group 2       | 12  | 17     | 17     | 20.2  | 22     | 33   |         |
| Sitting     | Group 1       | 7   | 9.75   | 11     | 17.36 | 24     | 36   | 0.168   |
|             | Group 2       | 8   | 9      | 9      | 9.33  | 9.75   | 11   |         |
| OFC         | Group 1       | 53  | 54.3   | 56     | 55.98 | 57     | 59.5 | <0.001  |
|             | Group 2       | 42  | 45     | 48     | 46.93 | 48.25  | 52   |         |

**Table S3:** Statistical analysis of the developmental milestones of sitting, walking and speech, and ages achieved in either patient Group 1 of Group 2 mutation cases. Pearson's Chi-squared test was applied. Walking and OFC show a statistically significant difference between Group 1 and Group 2 individuals.
